# Supplementary material for: Capillary assemblies in a rotating magnetic field
Source: Royal Society of Chemistry journal article supplement (doi:10.1039/c9sm01414d), 2019-01-01
Supplement: c9sm01414d2.pdf [file c9sm01414d2.pdf]

## Supplementary information: Capillary assemblies in a rotating magnetic field

Galien Grosjean,<sup>\*a</sup> Maxime Hubert<sup>a,c</sup>, Ylona Collard<sup>a</sup>, Alexander Sukhov<sup>b</sup>, Jens Harting<sup>b,e</sup>, Ana-Sunčana Smith<sup>c,d</sup> and Nicolas Vandewalle<sup>a</sup>

The accompanying video `SupMat_traj.mp4` shows four successive clips corresponding to the four experimental trajectories from fig. 4 in the article. The corresponding numerical simulations from fig. 9 are shown simultaneously. Each of the four clips corresponds to one set of parameters and is shown for 5 s in real time. The first three clips show three increasing values of the amplitude of the rotating horizontal field  $B_h = 0.25$  mT, 0.5 mT and 2 mT while the frequency  $f$  is kept constant at 1 Hz. The last clip corresponds to  $B_h = 2.5$  mT and  $f = 2$  Hz.

These clips cover the various regimes discussed in the paper. First, at low amplitude, the dynamics is driven by the magnetic anisotropy of the particles. The rotation speed is low and the shape of the assembly is unaffected by the field. Thanks to dirt trapped on one of the particles, one can see its individual rotational motion, which at first is only partial. In the second clip, this individual rotation makes a full turn and the rotation speed is increased. In the third clip, the dipole-dipole interaction becomes more important, as the assembly begins to deform. Finally, the fourth clip shows the peculiar “juggling” regime, where the combined high amplitude and high frequency causes high deformations. The effect of the magnetic isotropy of the particles becomes negligible as the dynamics is mainly driven by the non-reciprocal deformation of the structure. The numerical simulations recover the same general behavior. However, the simulated assembly rotates more slowly at low amplitude, where a more complete description of the magnetic properties might be required. By comparison, the high-deformation regime is more accurately predicted.

---

<sup>a</sup> GRASP Lab, CESAM Research Unit, University of Liège, B-4000 Liège, Belgium; E-mail: ga.grosjean@uliege.be

<sup>b</sup> Helmholtz Institute Erlangen-Nürnberg for Renewable Energy (IEK-11), Forschungszentrum Jülich, Fürther Straße 248, 90429 Nürnberg, Germany.

<sup>c</sup> PULS Group, Institute for Theoretical Physics and Cluster of Excellence: Engineering of Advanced Materials, Friedrich Alexander University Erlangen-Nürnberg, Cauerstraße 3, 91058 Erlangen, Germany.

<sup>d</sup> Group for Computational Life Sciences, Division of Physical Chemistry, Institute Ruder Boškovic, Zagreb, Croatia.

<sup>e</sup> Department of Applied Physics, Eindhoven University of Technology, P.O. box 513, NL-5600MB Eindhoven, The Netherlands.
